# Supplementary material for: A sandwich-like configuration with a signal amplification strategy using a methylene blue/aptamer complex on a heterojunction 2D MoSe2/2D WSe2 electrode: Toward a portable and sensitive electrochemical alpha-fetoprotein immunoassay
Source: Front Cell Infect Microbiol. 2022 Oct 27;12:916357. doi: 10.3389/fcimb.2022.916357 (PMC9646986; doi:10.3389/fcimb.2022.916357)
Supplement: Supplementary file 1 [file DataSheet_1.docx]

*Supporting Information*

A Sandwich-like Configuration with a Signal Amplification Strategy Using a Methylene Blue/Aptamer Complex on a Heterojunction 2D MoSe2/2D WSe2 Electrode: Toward a Portable and Sensitive Electrochemical Alpha-fetoprotein Immunoassay

Supakeit Chanarsa1,2, Jaroon Jakmunee1,2,3, Kontad Ounnunkad1,2,3*

1Department of Chemistry, Faculty of Science, Chiang Mai University, Chiang Mai 50200, Thailand

2Center of Excellence for Innovation in Chemistry, Faculty of Science, Chiang Mai University, Chiang Mai 50200, Thailand

3Research Center on Chemistry for Development of Health Promoting Products from Northern Resources, Chiang Mai University, Chiang Mai 50200, Thailand

*** Correspondence:**Corresponding Author
kontad.ounnunkad@cmu.ac.th

suriyacmu@yahoo.com


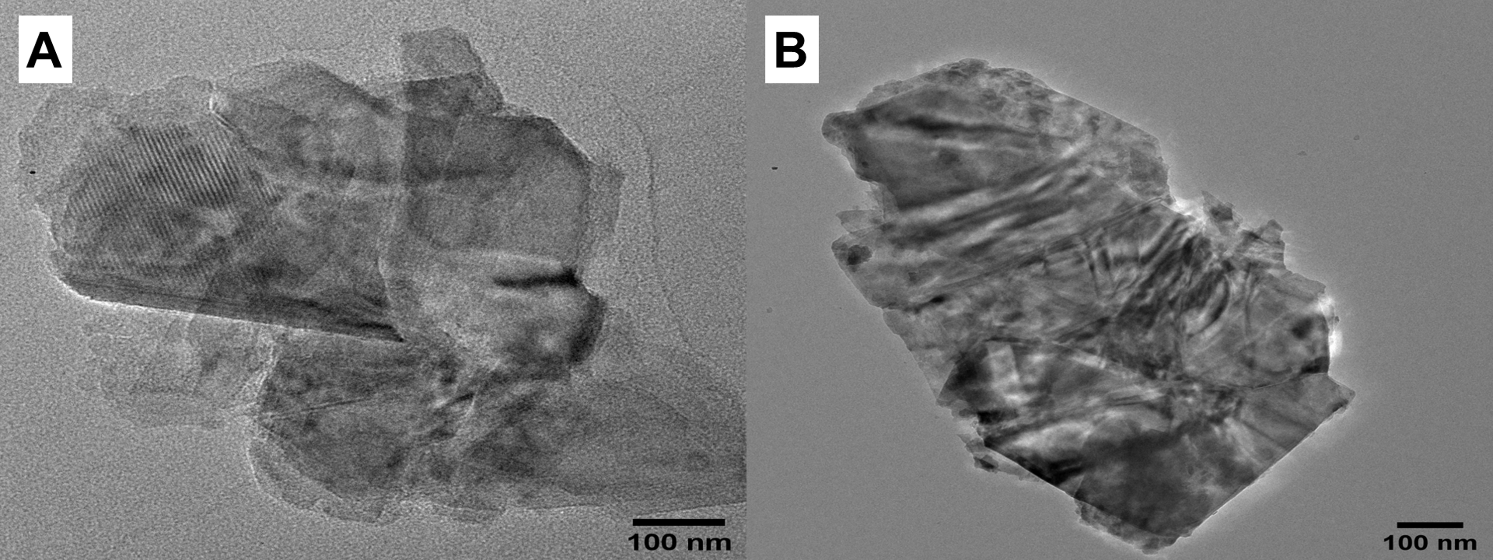


**Figure S1** TEM images of MoSe2 (**A**) and WSe2 (**B**)
